# Supplementary material
Source: PubMed Central journal article supplement (PMC8250536)
Supplement: HEP-73-2099-s001.pdf [file HEP-73-2099-s001.pdf]

**Supplementary table-1. Comparison of AIH and matched non-AIH chronic liver disease (CLD) cohorts**

| <b>Category</b>   | <b>Variable</b>         | <b>AIH<br/>(n=110)</b> | <b>Non-AIH CLD<br/>(n=220)</b> | <b>p value</b> |
|-------------------|-------------------------|------------------------|--------------------------------|----------------|
| Demographics      | Age>65                  | 17 (15.5%)             | 28 (12.7%)                     | 0.500          |
|                   | Female                  | 88 (80.0%)             | 182 (83.1%)                    | 0.543          |
| Comorbidities     | Diabetes mellitus       | 27 (24.5%)             | 51 (23.2%)                     | 0.785          |
|                   | Hypertension            | 26 (23.6%)             | 63 (28.6%)                     | 0.360          |
|                   | Tobacco                 | 7 (6.4%)               | 17 (7.7%)                      | 0.823          |
|                   | Coronary artery disease | 5 (4.5%)               | 12 (5.5%)                      | 0.798          |
|                   | Heart failure           | 2 (1.8%)               | 11 (5.0%)                      | 0.233          |
|                   | Cancer                  | 5 (4.5%)               | 13 (5.9%)                      | 0.798          |
| Cirrhosis         | Yes                     | 32 (29.1%)             | 50 (23.3%)                     | 0.345          |
| COVID-19 Outcomes | Hospitalization         | 51 (46.4%)             | 109 (50.0%)                    | 0.560          |
|                   | Supplemental Oxygen     | 42 (38.2%)             | 92 (42.2%)                     | 0.553          |
|                   | Severe COVID-19         | 17 (15.5%)             | 44 (20.2%)                     | 0.231          |
|                   | Overall Mortality       | 11 (10.0%)             | 25 (11.5%)                     | 0.852          |
